# Supplementary material for: Runoff Responses of Various Driving Factors in a Typical Basin in Beijing-Tianjin-Hebei Area
Source: MDPI journal article supplement (doi:10.3390/rs15041027), 2023-02-13
Supplement: s1 [file s1]

## Supplementary Material

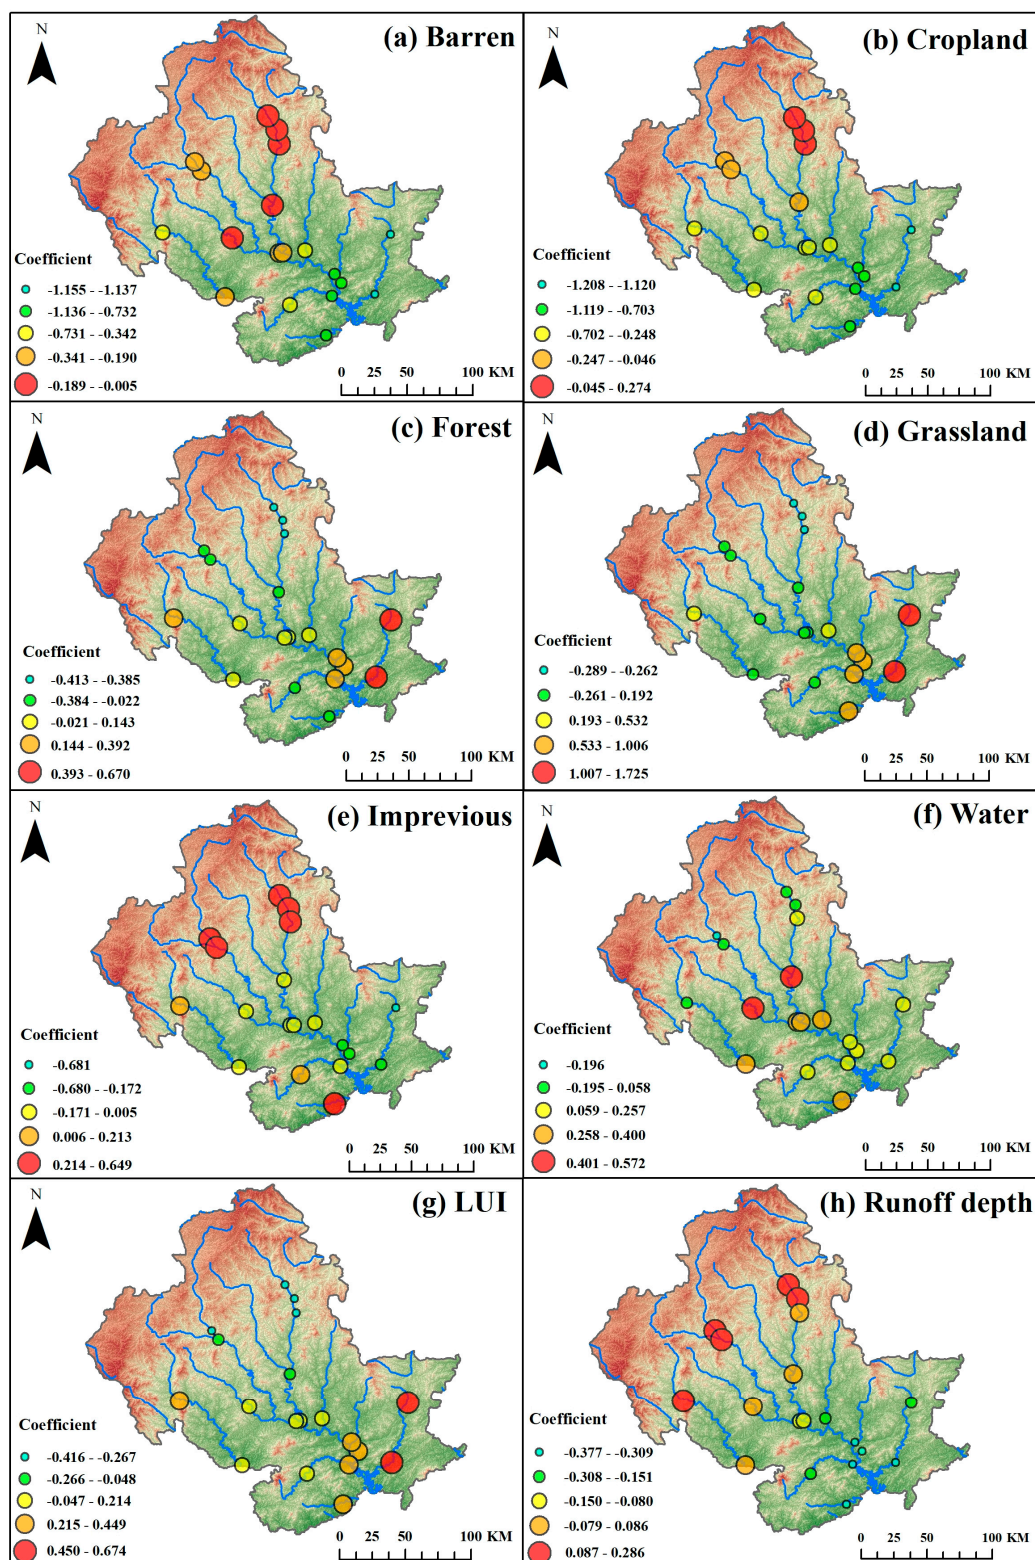

**Figure S1** Geographically and temporally weighted regression between land use and runoff in 2006

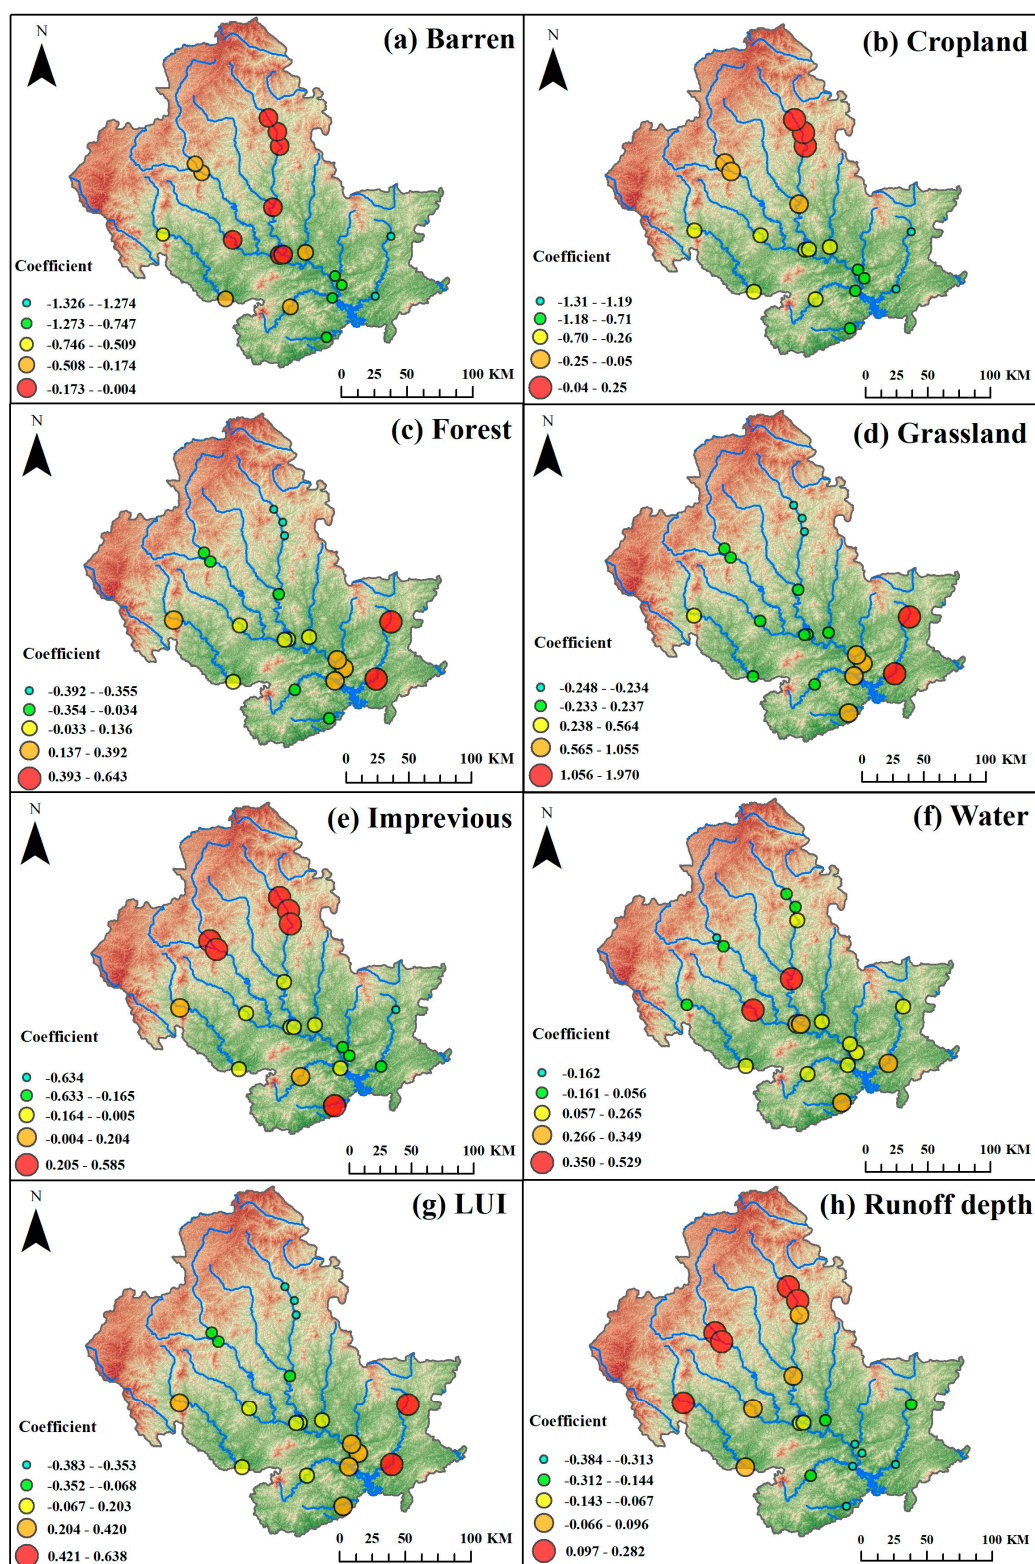

**Figure S2** Geographically and temporally weighted regression between land use and runoff in 2010



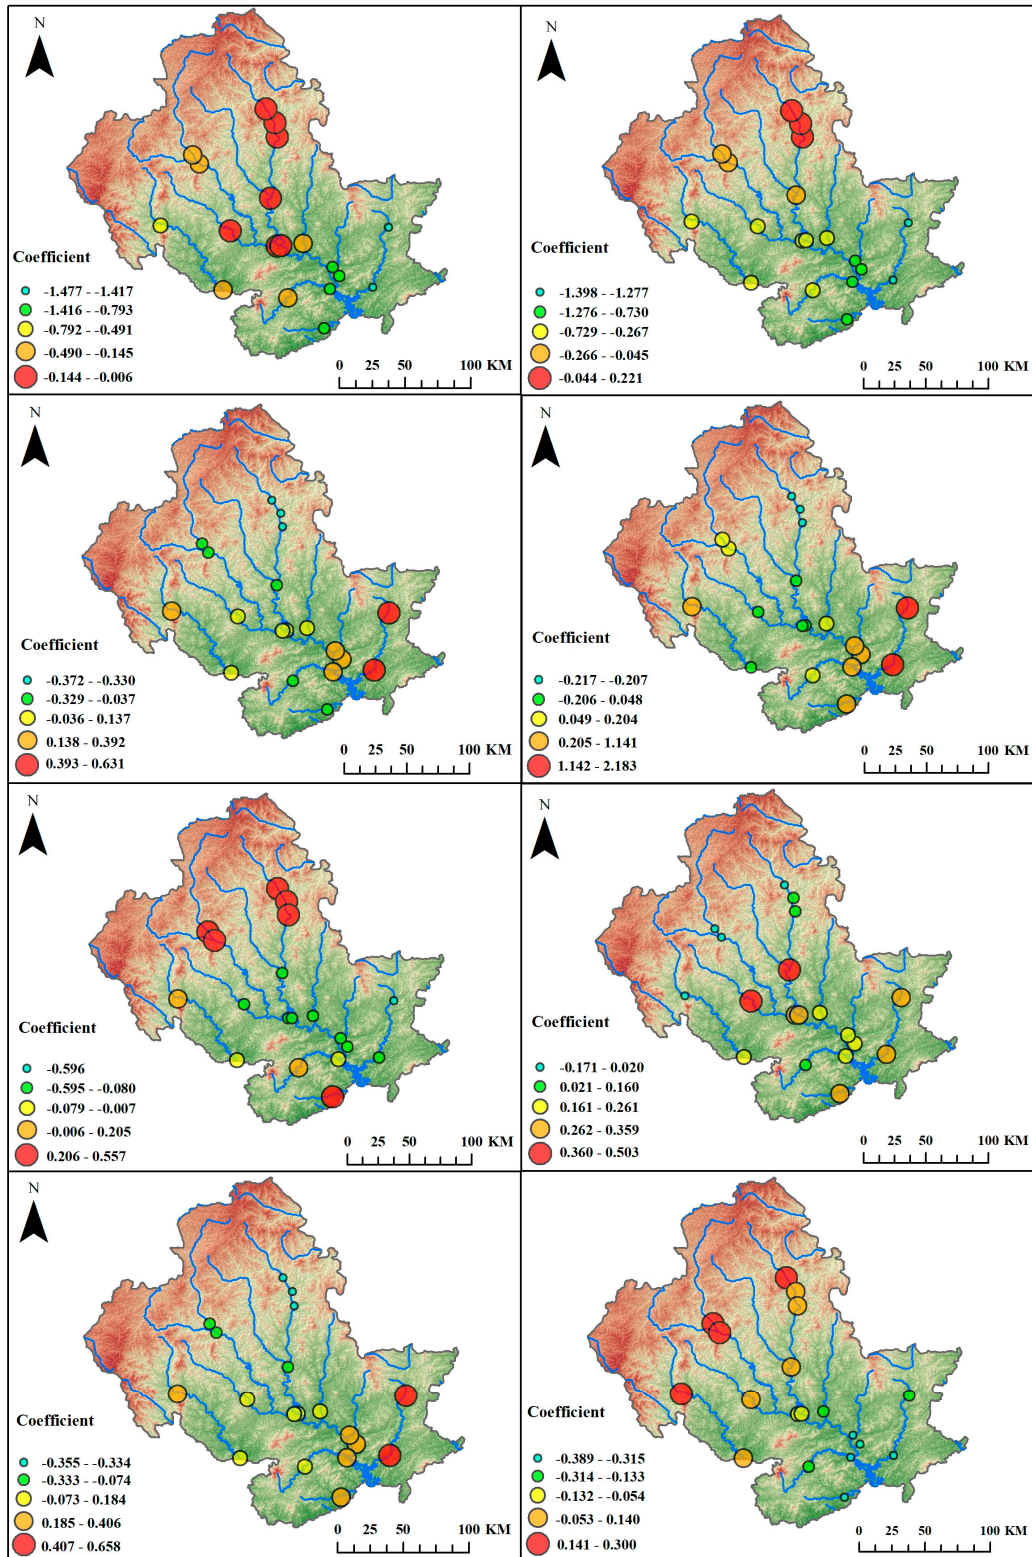

**Figure S3** Geographically and temporally weighted regression between land use and runoff in 2014

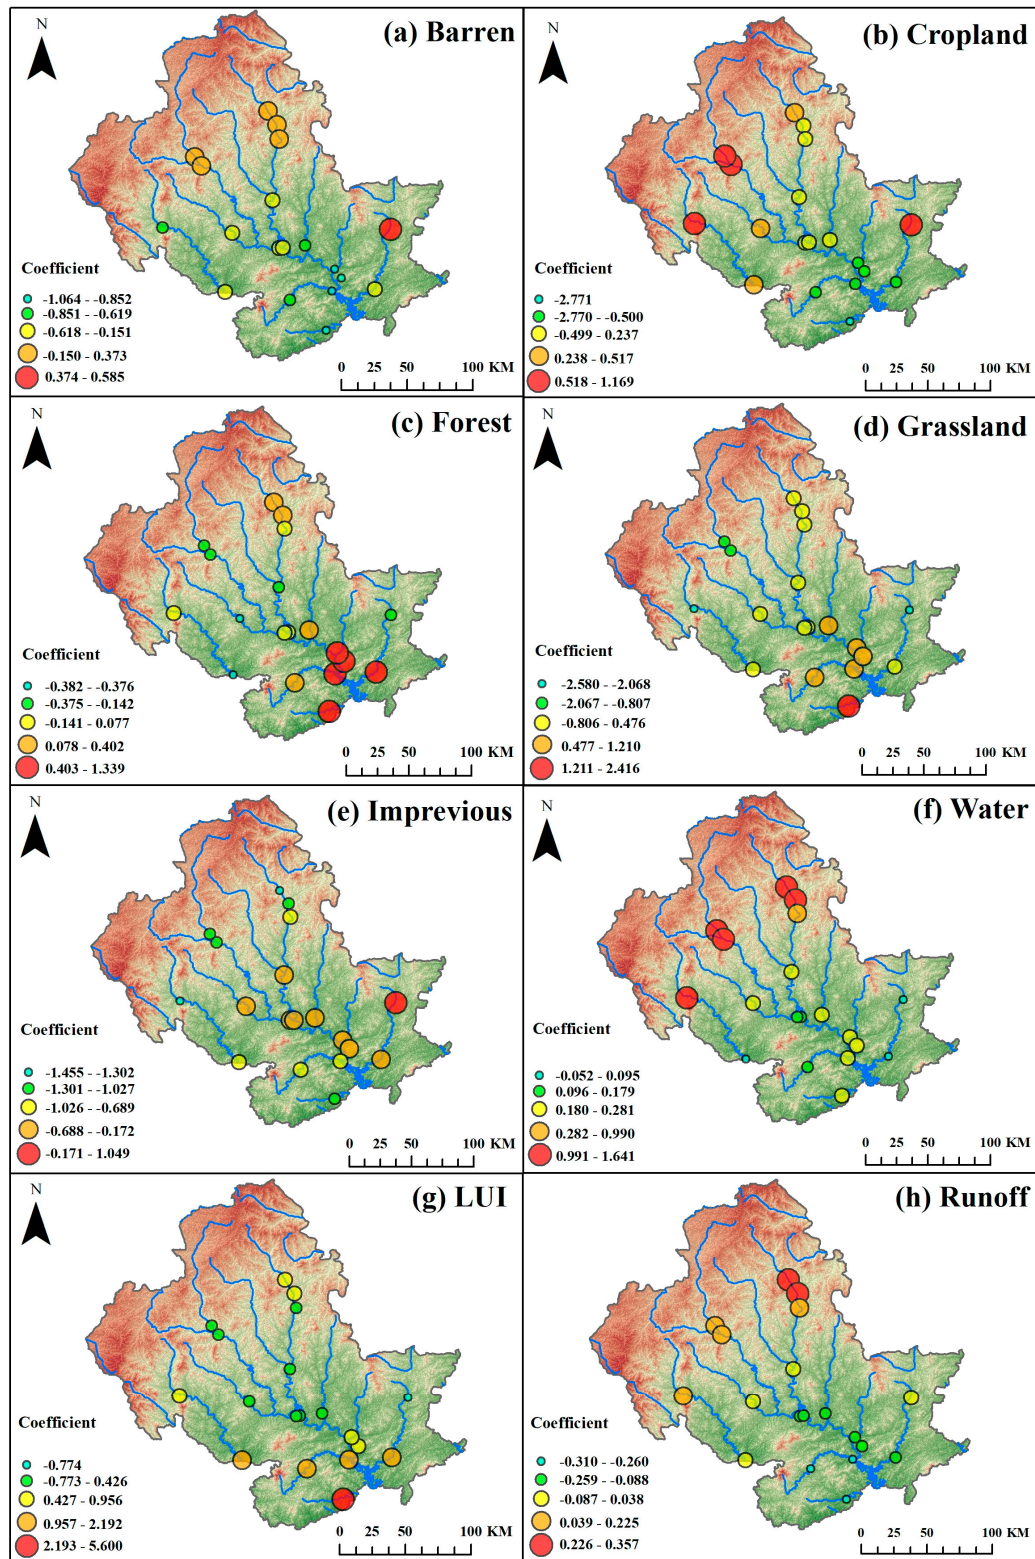

**Figure S4** Geographically and temporally weighted regression between land use and runoff depth in 2006



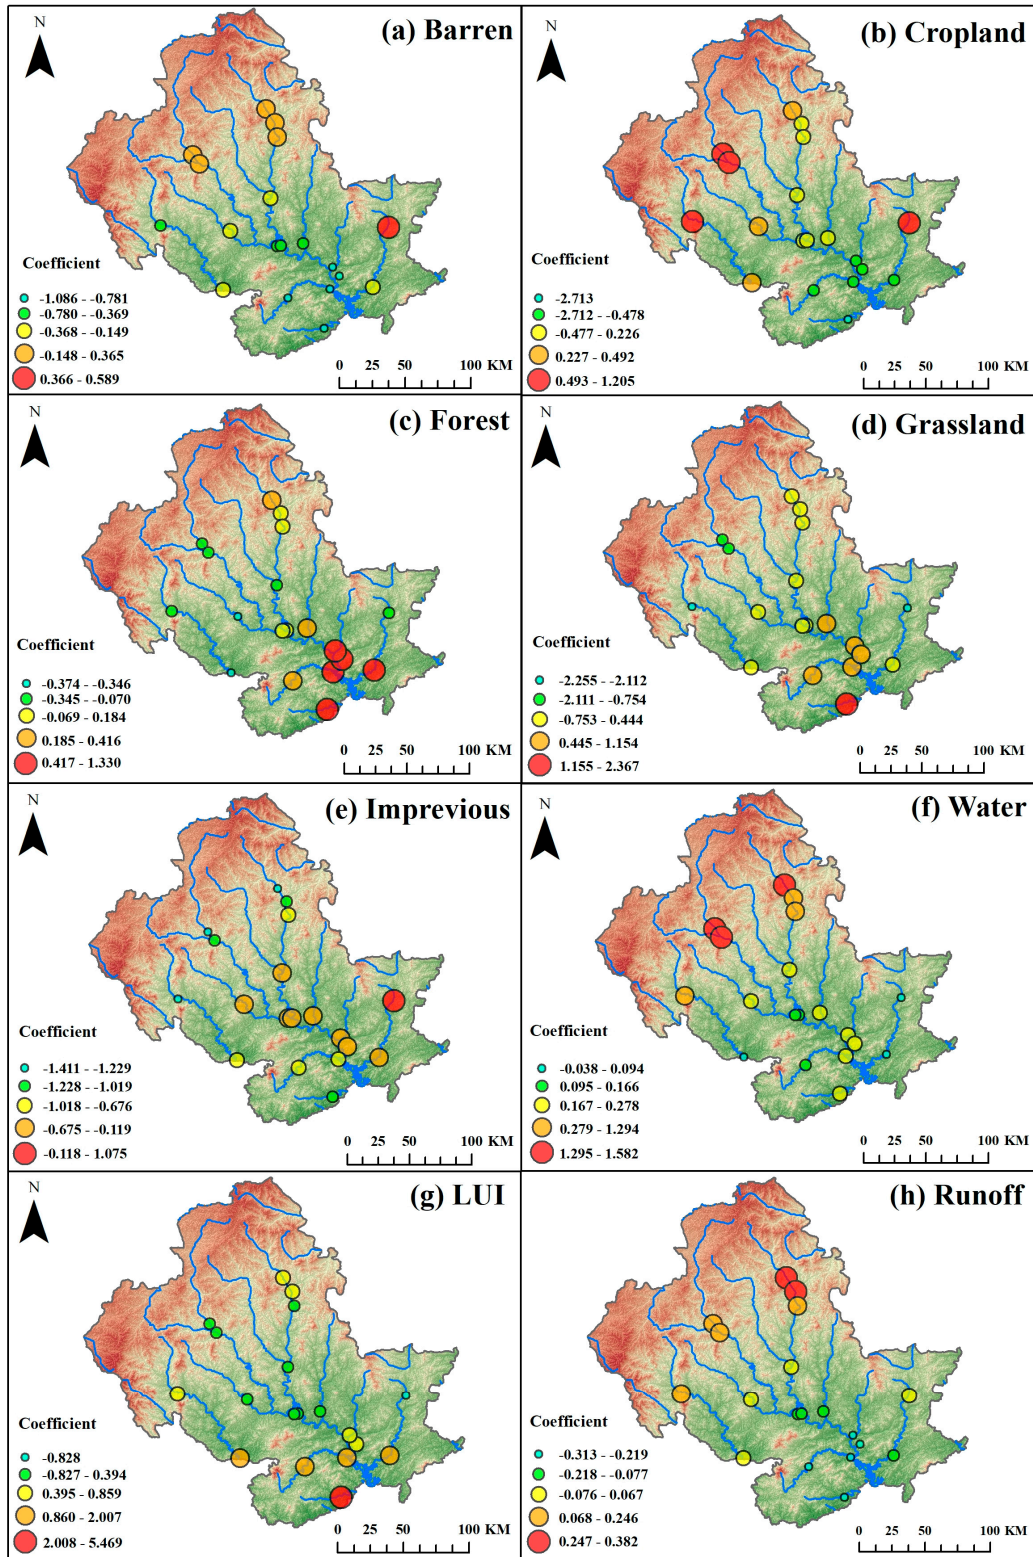

**Figure S5** Geographically and temporally weighted regression between land use and runoff depth in 2010

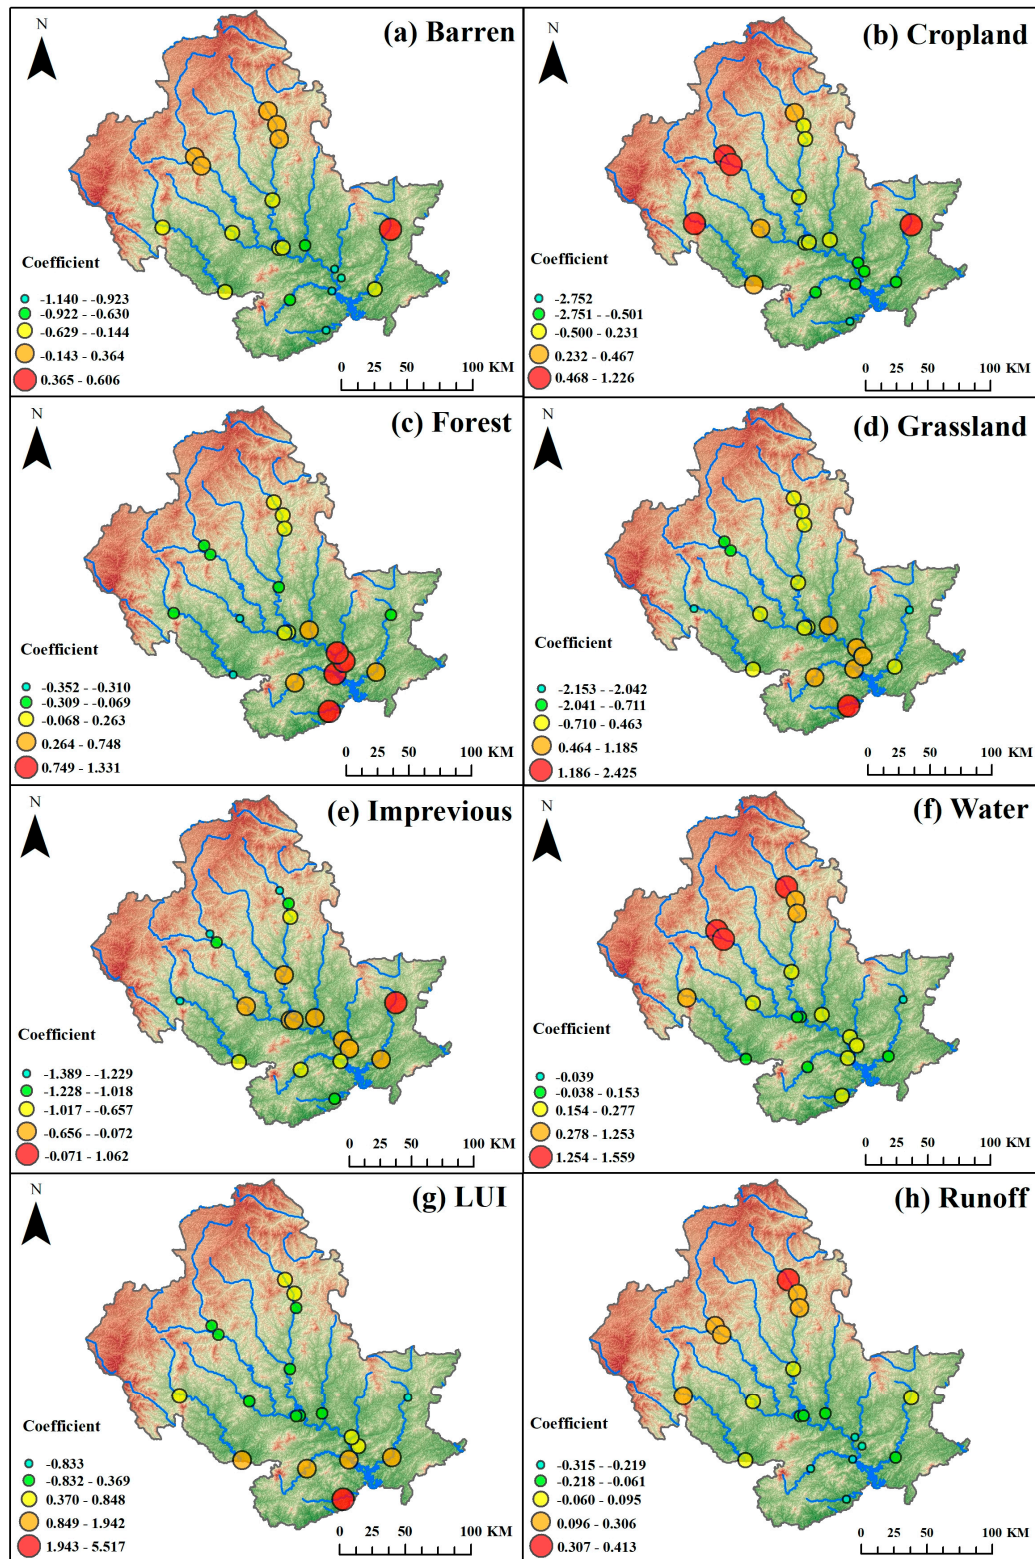

**Figure S6** Geographically and temporally weighted regression between land use and runoff depth in 2014



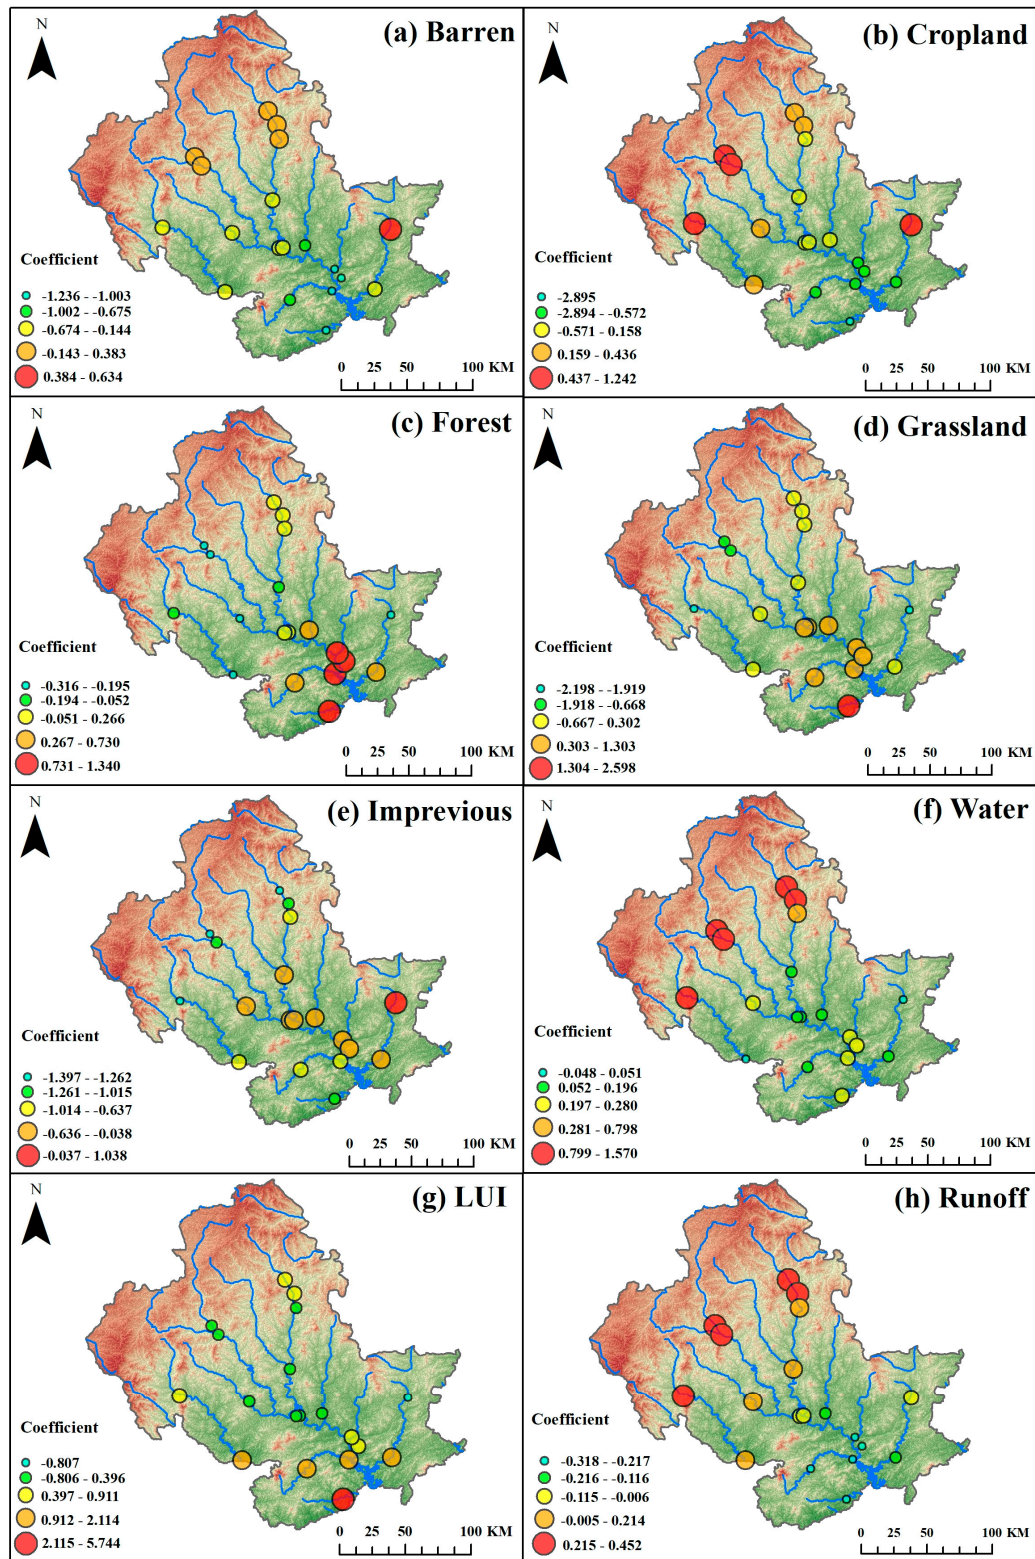

**Figure S7** Geographically and temporally weighted regression between land use and runoff depth in 2018

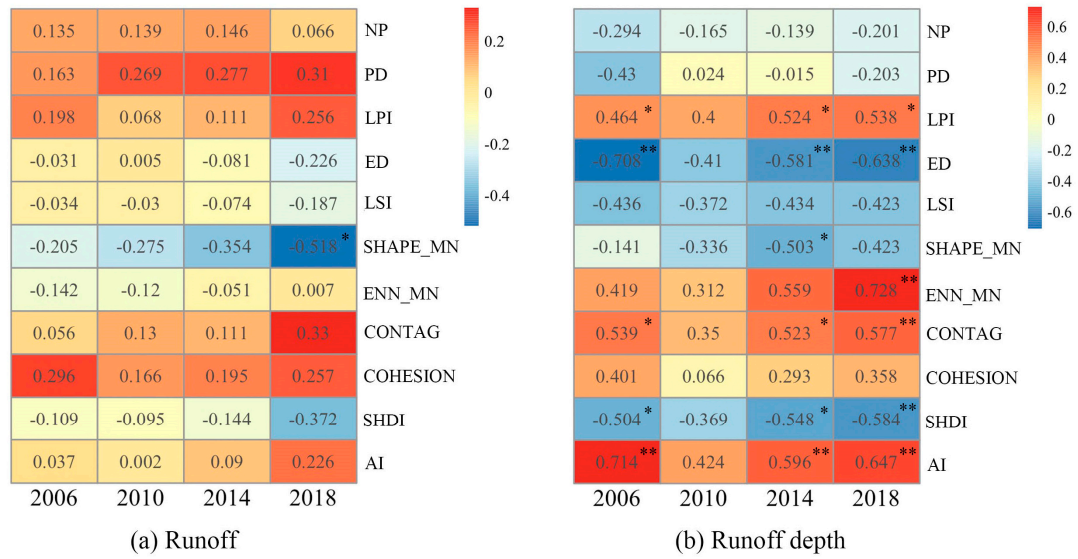

**Figure S8** Correlations between runoff and runoff depth as well as landscape indexes in 2006, 2010, 2014 and 2018

(\*,  $p < 0.05$ ; \*\*,  $p < 0.01$ ; \*\*\*,  $p < 0.001$ )

**Table S1** Accuracy of geographically and temporally weighted regression

| Dependent variable | $AIC_c$ | $R^2$ | Bandwidth |
|--------------------|---------|-------|-----------|
| Runoff             | 21.636  | 0.500 | 0.267     |
| Runoff depth       | 3.352   | 0.684 | 0.246     |
